# Supplementary material for: The glucose-assisted synthesis of a graphene nanosheet–NiO composite for high-performance supercapacitors
Source: Royal Society of Chemistry journal article supplement (doi:10.1039/c3nj01351k), 2014-01-01
Supplement: c3nj01351k1.pdf [file c3nj01351k1.pdf]

## Glucose-assisted synthesis of graphene nanosheets/NiO composite for high-performance supercapacitors

Meiling Zhou, Hui Chai\*, Dianzeng Jia\* and Wanyong Zhou

(Key laboratory of clean energy material and technology, Ministry of education, Key Laboratory of Advanced Functional Materials, Autonomous Region, Institute of Applied Chemistry, Xinjiang University, Urumqi

830046, Xinjiang, P.R. China)

\*Corresponding author: D.Z. Jia (1962-), Tel: +86 991 858 3083; Fax: +86 991 858 8209

E-mail: hehchh@sina.com, jdz0991@gmail.com

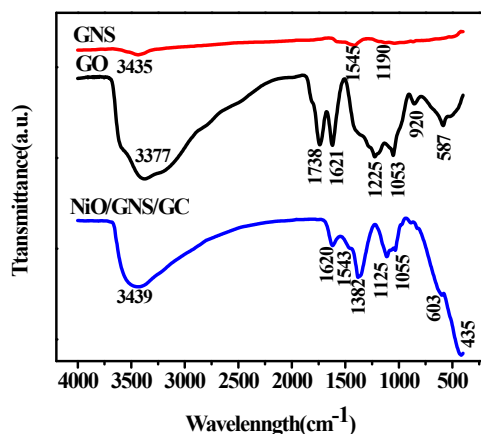

Fig.S1.FT-IR spectra of GNS, GO and NiO/GNS/GC.

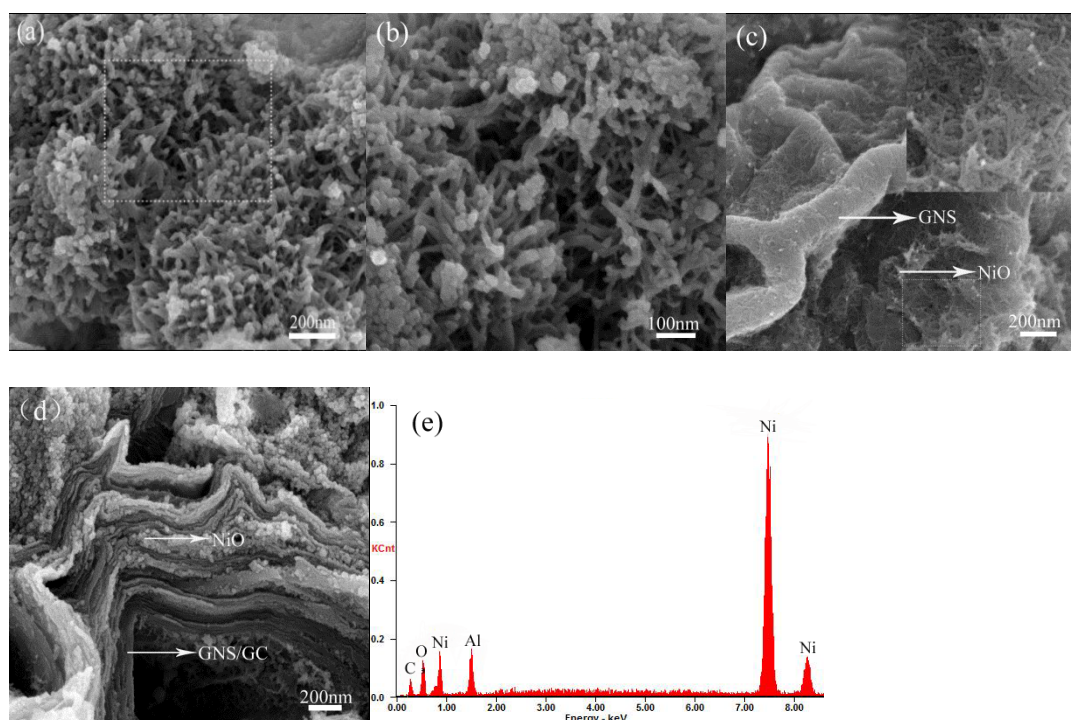

Fig.S2. SEM images of (a) pure NiO, (b) higher magnification of pure NiO (higher magnifications of the (a) square frame regions), (c) NiO/GNS composites (inset higher magnifications of the square frame regions), (d) NiO/GNS/GC composites, (e) EDX pattern of the NiO/GNS/GC.
